# Supplementary material
Source: PubMed Central journal article supplement (PMC6440789)

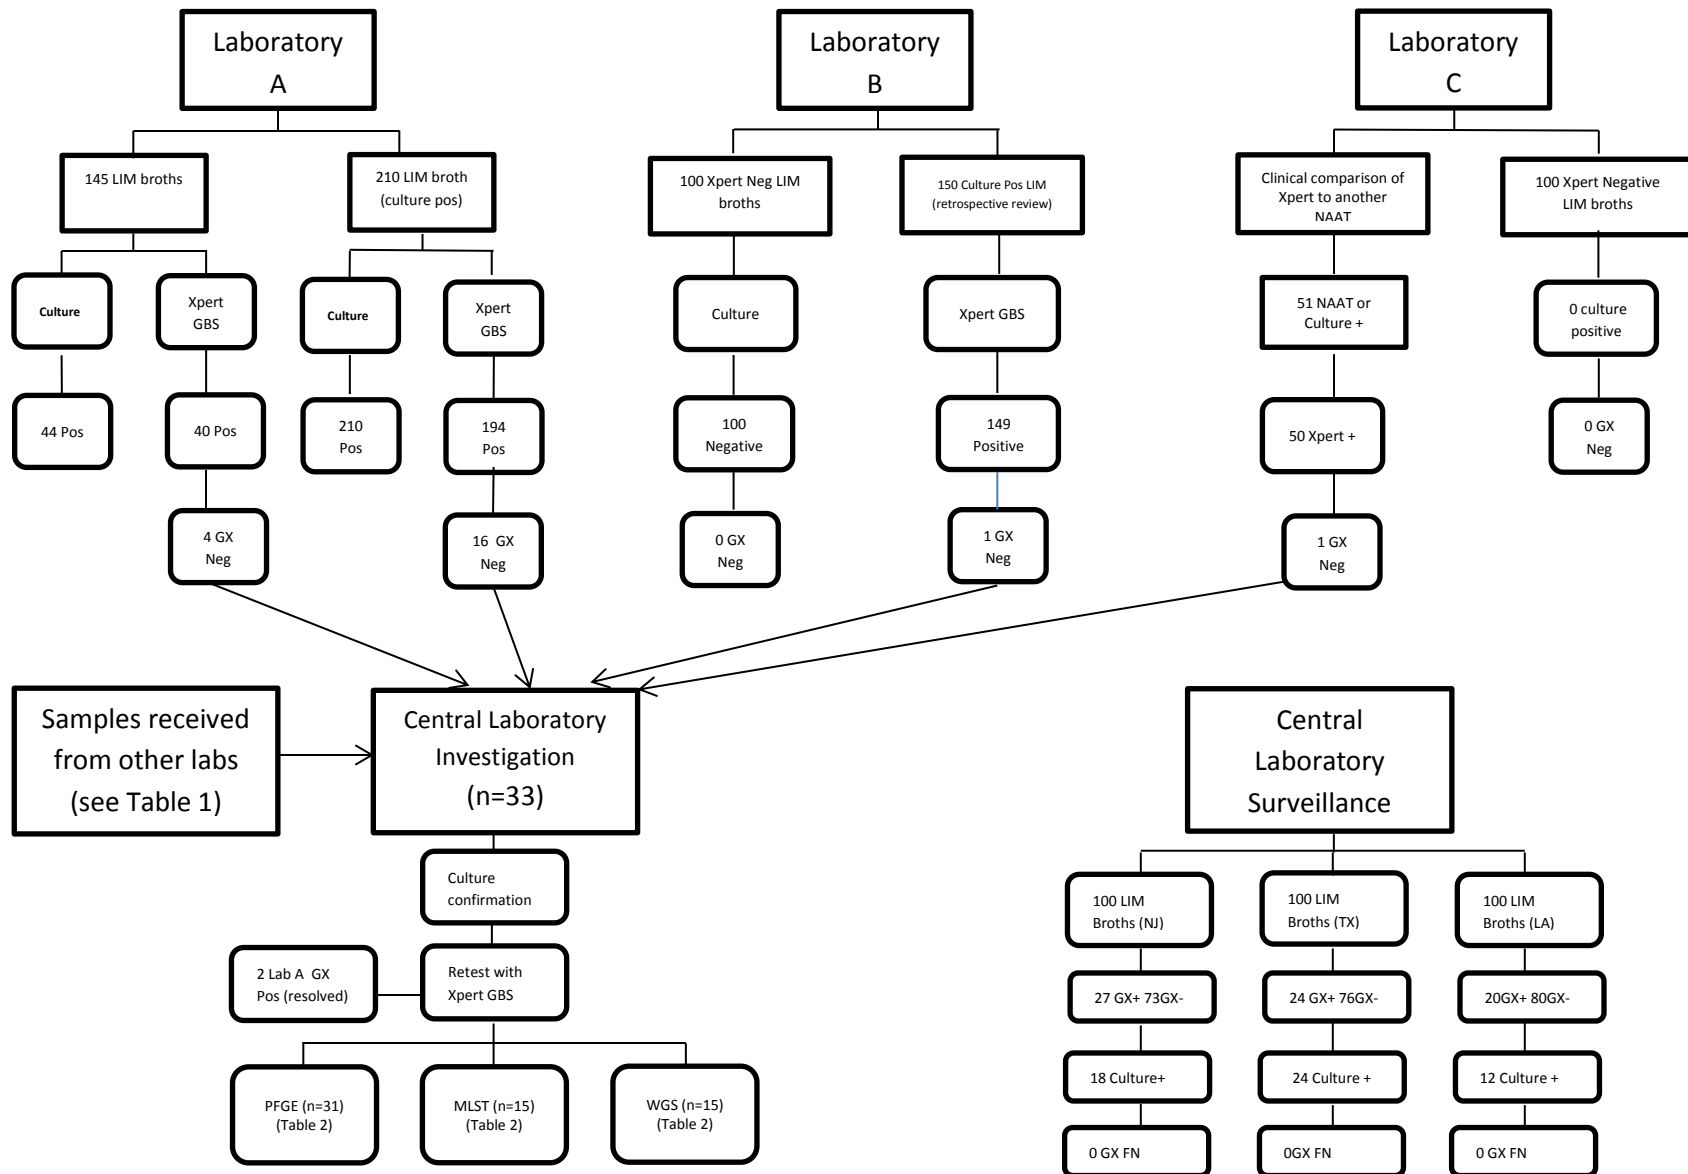

**Supplementary Figure 1.** Schematic representation of the study workflow.

Supplement: JCM.02040-18-s0001.pdf [file JCM.02040-18-s0001.pdf]
